# Supplementary material for: Glass-Transition Dynamics of Mixtures of Linear Poly(vinyl methyl ether) with Single-Chain Polymer Nanoparticles: Evidence of a New Type of Nanocomposite Materials
Source: MDPI journal article supplement (doi:10.3390/polym11030533), 2019-03-21
Supplement: s1 [file s1]

# Supplementary Materials: Glass-Transition Dynamics of Mixtures of Linear Poly(vinyl methyl ether) with Single-Chain Polymer Nanoparticles: Evidence of a New Type of Nanocomposite Materials

Beatriz Robles-Hernández<sup>1,2,\*</sup>, Marina González-Burgos<sup>3</sup>, José A. Pomposo<sup>1,3,4</sup>, Juan Colmenero<sup>1,2,3</sup> and Ángel Alegría<sup>1,3,\*</sup>

## 1. Materials

Styrene (S) ( $\geq 99\%$ ), 4-(chloromethyl) styrene (CMS) ( $\geq 90\%$ ), sodium azide ( $\text{NaN}_3$ ) ( $\geq 99\%$ ), dansylhydrazine ( $\geq 98\%$ ), 4,4'-Azobis(4-cyanovaleric acid) (ACVA) ( $\geq 98\%$ ), N-N-Dimethylformamide (DMF) ( $\geq 99.9\%$ ), benzaldehyde (BA) (purified by redistillation,  $\geq 99.5\%$ ), chloroform ( $\text{CHCl}_3$ ) ( $\geq 99.8\%$ ) and deuterated chloroform ( $\text{CDCl}_3$ ) (99.96 atom % D, containing 0.03% (*v/v*) tetramethylsilane, TMS) were obtained from Aldrich and used, unless specified, as received. Methanol (MeOH) (synthesis grade) and tetrahydrofuran (THF) (HPLC grade) were purchased from Scharlab. Benzyl azide (94%) was purchased from Alpha Aesar. Deionized water obtained from a Thermo Scientific apparatus (Barnstead TII Pure Water System) was used in this work. S and CMS were purified by passing through basic alumina. Scheme 1 displays the structures of some compounds used in the current investigation.

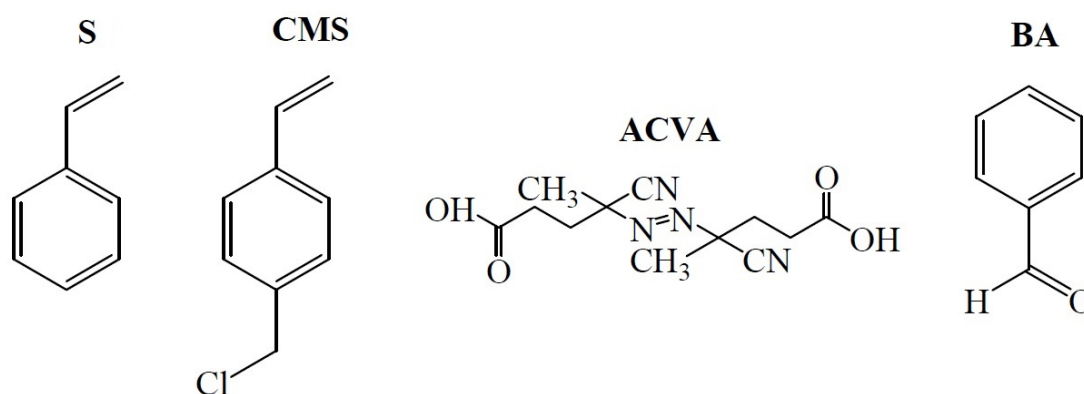

Scheme 1. Structures of some compounds used in the current investigation.

## 2. Instrumentation

### 2.1. Microwave Assisted Synthesis

Microwave-assisted synthesis was carried out in a CEM Discover LabMate<sup>TM</sup> apparatus. It was equipped with an 80 ml Sealed Vessel Accessory, which has a working volume ranging from 15 ml to 50 ml.

## 3. Synthesis

### 3.1. Synthesis of poly(styrene-ran-chloromethyl styrene) precursor

In a typical procedure of synthesis of precursor, the copolymerization of S (2 ml, 17.4 mmol) and CMS (0.615 ml, 3.7 mmol) was carried out using ACVA (1.7 mg,  $6.1 \times 10^{-3}$  mmol) as initiator. The reaction mixture was degassed by passing argon for 15 min and then stirred for 3 h at 353 K. After that,

22 the copolymer was redissolved in a minimal amount of THF and added to a large excess of methanol.  
 23 The resulting precursor (C30) was isolated by filtration and further dried at room temperature under  
 24 dynamic vacuum (Yield: 30%,  $M_w$  (size exclusion chromatography, SEC) = 267 kDa, PDI (SEC) = 1.3).  
 25 Copolymer was obtained as light yellow powders with 30 mol % of CMS content, as determined by  
 26  $^1\text{H-NMR}$  spectroscopy following reported procedures[1]. Scheme 2 summarizes the synthetic route for  
 27 obtaining the precursor.

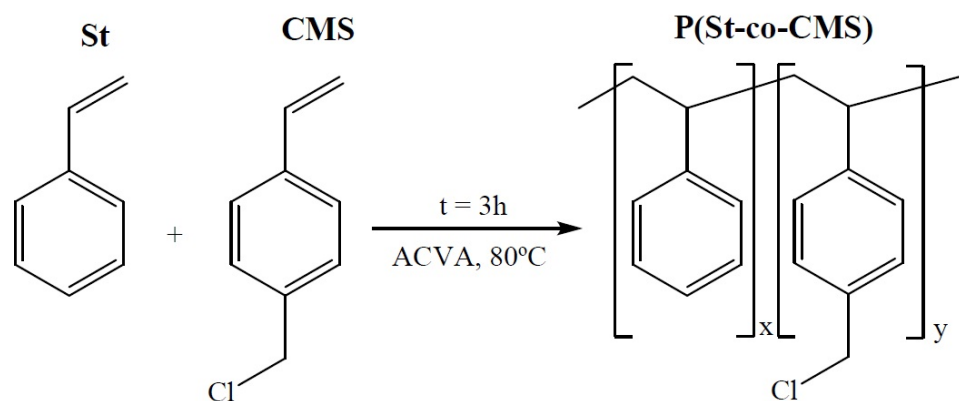

**Scheme 2.** Synthesis of poly(styrene<sub>0.7-ran</sub>-chloromethyl styrene<sub>0.3</sub>) copolymers ( $y = 0.3$  mol).

### 28 3.2. Synthesis of poly(styrene-ran-azidomethyl styrene) precursor

29 In a typical reaction, poly(styrene-co-chloromethyl styrene) (C30, 350 mg, 0.64 mmol CMS) was  
 30 dissolved in DMF (14 ml) at room temperature. Then, NaN<sub>3</sub> (2 eq., 83.2 mg, 1.3 mmol) was added  
 31 and the mixture was maintained under stirring for 24 h. After reaction completion, the system was  
 32 concentrated and precipitated in a mixture of MeOH/H<sub>2</sub>O (1:1). Finally, the resulting precursor (P30)  
 33 was dried in a vacuum oven at room temperature under dynamic vacuum (Yield: 90%,  $M_w$  (SEC)  
 34 = 275 kDa, PDI (SEC) = 1.3,  $R_H$  (dynamic light scattering, DLS) = 14 nm,  $T_g$  (differential scanning  
 35 calorimetry, DSC) = 366 K). Precursors was obtained as powders with 30% mol of AMS content. The  
 36 complete transformation of chloromethyl (4.5 ppm) to azidomethyl (4.2 ppm) moieties was confirmed  
 37 by  $^1\text{H-NMR}$  spectroscopy (see S.I. in ref.[2]).

### 38 3.3. Synthesis of intra-chain cross-linked nanoparticles

39 In a typical reaction, the precursor (P30, 50 mg, 0.432 mmol) was dissolved in DMF (50 mL) at  
 40 room temperature. Then, the mixture was heated to 473 K under microwave irradiation (300 W, 150  
 41 psi) and maintained there for 30 min. Then, the system was cooled down to room temperature and  
 42 concentrated in a vacuum line using Schlenk flasks. The resulting nanoparticles (NP30) were isolated  
 43 by precipitation in a mixture of MeOH/H<sub>2</sub>O (1:1) and dried in a vacuum oven at 313 K under dynamic  
 44 vacuum (Yield: 57%,  $M_w$  (SEC) = 274 kDa, PDI (SEC) = 1.3,  $R_H$  (DLS) = 10 nm,  $T_g$  (DSC) 405 K).

## 45 References

- 46 1. Huang, K.W.; Kuo, S.W. High-Heteronucleobase-Content Polystyrene Copolymers Prepared Using  
 47 Click Chemistry Form Supramolecular Structures With Melamine Through Complementary Multiple  
 48 Hydrogen-Bonding Interactions. *Macromol. Chem. Phys.* **2012**, *213*, 1509–1519. doi:10.1002/macp.201200114.
- 49 2. González-Burgos, M.; Alegría, A.; Arbe, A.; Colmenero, J.; Pomposo, J.A. An unexpected route  
 50 to aldehyde-decorated single-chain nanoparticles from azides. *Polym. Chem.* **2016**, *7*, 6570–6574.  
 51 doi:10.1039/c6py01602b.
